# Supplementary material for: The mechanism of hydrogen-accelerated melting of polycrystalline copper
Source: Royal Society of Chemistry journal article supplement (doi:10.1039/d0cp05828a), 2021-01-01
Supplement: d0cp05828a1.pdf [file d0cp05828a1.pdf]

## Supporting Information

### Mechanism of Hydrogen-accelerated Melting of Polycrystalline Copper

Haishen Huang,<sup>a,b</sup> Liqiang Ai,<sup>c</sup> Min Chen,<sup>c</sup> and Yongjun Lü<sup>a,\*</sup>

(Dated: November 9, 2020)

<sup>a</sup>*School of Physics, Beijing Institute of Technology, Beijing 100081, P. R. China*

<sup>b</sup>*School of Physics and Electronic Science, Zunyi Normal University, Zunyi, 563006, P. R. China*

<sup>c</sup>*Department of Engineering Mechanics, Center for Nano and Micro Mechanics, Tsinghua University, Beijing 100084, P. R. China*

*\*Corresponding author, E-mail: yongjunlv@bit.edu.cn*

TABLE S1: Lattice constants  $a$ ,  $c$  (in unit of Å), bulk moduli  $B$  (in unit of GPa), cohesive energies  $E_c$  (in unit of kcal mol<sup>-1</sup>) and relative energy  $\Delta E$  (in unit of kcal mol<sup>-1</sup>) for different phases of Cu.

|     |            | ReaxFF | DFT    | Expt.              |
|-----|------------|--------|--------|--------------------|
| fcc | $a$        | 3.61   | 3.63   | 3.61 <sup>a</sup>  |
|     | $B$        | 122.43 | 131.28 | 137.8 <sup>b</sup> |
|     | $E_c$      | 80.39  | 80.31  | 81.2 <sup>c</sup>  |
|     | $\Delta E$ | 0.00   | 0.00   | –                  |
| bcc | $a$        | 2.88   | 2.89   | –                  |
|     | $B$        | 109.43 | 129.48 | –                  |
|     | $E_c$      | 79.54  | 79.45  | –                  |
|     | $\Delta E$ | 0.86   | 0.86   | –                  |
| a15 | $a$        | 4.59   | 4.62   | –                  |
|     | $B$        | 112.15 | 123.36 | –                  |
|     | $E_c$      | 77.75  | 78.07  | –                  |
|     | $\Delta E$ | 2.64   | 2.24   | –                  |
| ac  | $a$        | 2.38   | 2.41   | –                  |
|     | $B$        | 119.64 | 95.75  | –                  |
|     | $E_c$      | 69.02  | 69.68  | –                  |
|     | $\Delta E$ | 11.38  | 10.63  | –                  |
| dia | $a$        | 5.32   | 5.36   | –                  |
|     | $B$        | 47.32  | 50.42  | –                  |
|     | $E_c$      | 40.71  | 56.67  | –                  |
|     | $\Delta E$ | 39.68  | 23.64  | –                  |
| hcp | $a$        | 2.55   | 2.57   | –                  |
|     | $c$        | 4.16   | 4.20   | –                  |
|     | $B$        | 120.16 | 129.78 | –                  |
|     | $E_c$      | 80.28  | 80.13  | –                  |
|     | $\Delta E$ | 0.12   | 0.18   | –                  |

<sup>a</sup> Reference 1.

<sup>b</sup> Reference 2.

<sup>c</sup> Reference 3.

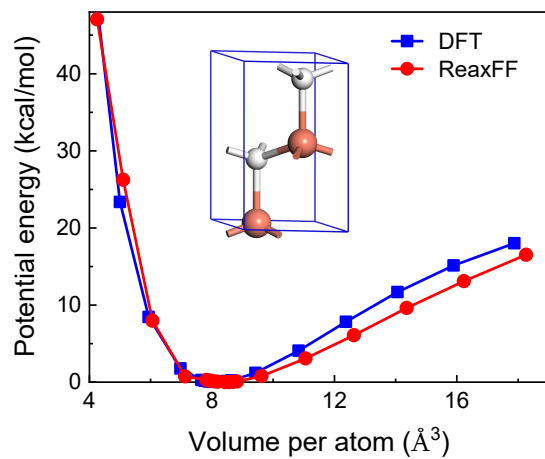

**Figure S1.** Equations of states calculated by ReaxFF and DFT for the hexagonal wurtzite type structure of CuH belonging to the space group  $P6_3mc$ .

TABLE S2: Lattice constants  $a$ ,  $c$  (in unit of  $\text{\AA}$ ), formation enthalpy  $E_f$  (in unit of  $\text{kcal mol}^{-1}$ ) for different phases of copper hydride crystals.

| Composition       | Space group  |       | ReaxFF | DFT   | Other DFT         | Expt.             |
|-------------------|--------------|-------|--------|-------|-------------------|-------------------|
| HCu               | $Fm\bar{3}m$ | $a$   | 3.87   | 3.89  | 3.90 <sup>a</sup> | 3.7 <sup>b</sup>  |
|                   |              | $E_f$ | 1.35   | 5.76  | –                 | –                 |
| HCu               | $Pm\bar{3}m$ | $a$   | 2.64   | 2.50  | –                 | –                 |
|                   |              | $E_f$ | 16.93  | 13.29 | –                 | –                 |
| HCu               | $F\bar{4}3m$ | $a$   | 4.03   | 4.02  | 4.02 <sup>a</sup> | –                 |
|                   |              | $E_f$ | 2.92   | 3.11  | –                 | –                 |
| HCu               | $P6_3mc$     | $a$   | 2.89   | 2.87  | 2.89 <sup>a</sup> | 2.90 <sup>c</sup> |
|                   |              | $c$   | 4.60   | 4.57  | 4.57 <sup>a</sup> | 4.60 <sup>c</sup> |
|                   |              | $E_f$ | 2.96   | 2.99  | –                 | –                 |
| H <sub>2</sub> Cu | $Fm\bar{3}m$ | $a$   | 2.90   | 3.04  | –                 | –                 |
|                   |              | $E_f$ | 10.96  | 9.66  | –                 | –                 |
| H <sub>2</sub> Cu | $Pa\bar{3}$  | $a$   | 4.10   | 4.29  | –                 | –                 |
|                   |              | $E_f$ | 10.97  | 9.66  | –                 | –                 |
| H <sub>2</sub> Cu | $Pn\bar{3}m$ | $a$   | 3.65   | 3.72  | –                 | –                 |
|                   |              | $E_f$ | 7.08   | 13.07 | –                 | –                 |
| H <sub>2</sub> Cu | $P4_2/mnm$   | $a$   | 4.78   | 4.78  | –                 | –                 |
|                   |              | $c$   | 2.40   | 2.40  | –                 | –                 |
|                   |              | $E_f$ | 11.94  | 6.39  | –                 | –                 |

<sup>a</sup> Reference 4.

<sup>b</sup> Reference 5.

<sup>c</sup> Reference 6.

## Force Field developed in this study

Cu/H ReaxFF reactive force field H. S. Huang et al.

39 ! Number of general parameters  
50.0000 ! Overcoordination parameter  
9.5469 ! Overcoordination parameter  
1.6725 ! Valency angle conjugation parameter  
1.7224 ! Triple bond stabilisation parameter  
6.8702 ! Triple bond stabilisation parameter  
60.4850 ! C2-correction  
1.0588 ! Undercoordination parameter  
4.6000 ! Triple bond stabilisation parameter  
12.1176 ! Undercoordination parameter  
13.3056 ! Undercoordination parameter  
-40.0000 ! Triple bond stabilization energy  
0.0000 ! Lower Taper-radius  
10.0000 ! Upper Taper-radius  
2.8793 ! Not used  
33.8667 ! Valency undercoordination  
6.0891 ! Valency angle/lone pair parameter  
1.0563 ! Valency angle  
2.0384 ! Valency angle parameter  
6.1431 ! Not used  
6.9290 ! Double bond/angle parameter  
0.3989 ! Double bond/angle parameter: overcoord  
3.9954 ! Double bond/angle parameter: overcoord  
-2.4837 ! Not used  
5.7796 ! Torsion/BO parameter  
10.0000 ! Torsion overcoordination  
1.9487 ! Torsion overcoordination  
-1.2327 ! Conjugation 0 (not used)  
2.1645 ! Conjugation

1.5591 ! vdWaals shielding  
 0.1000 ! Cutoff for bond order (\*100)  
 1.7602 ! Valency angle conjugation parameter  
 0.6991 ! Overcoordination parameter  
 50.0000 ! Overcoordination parameter  
 1.8512 ! Valency/lone pair parameter  
 0.5000 ! Not used  
 20.0000 ! Not used  
 5.0000 ! Molecular energy (not used)  
 0.0000 ! Molecular energy (not used)  
 0.7903 ! Valency angle conjugation parameter  
 2 ! Nr of atoms; cov.r; valency;a.m;Rvdw;Evdw;gammaEEM;cov.r2;  
     alfa;gammavdW;valency;Eunder;Eover;chiEEM;etaEEM;n.u.  
     cov r3;Elp;Heat inc.;n.u.;n.u.;n.u.;n.u.  
     ov/un;val1;n.u.;val3,vval4  
 H 0.9479 1.0000 1.0080 1.1364 0.0232 0.9900 -0.1000 1.0000  
     9.0643 4.7746 1.0000 0.0000 121.1250 4.7757 9.7732 1.0000  
     -0.1000 0.0000 62.4879 2.5194 2.3785 0.2223 1.0698 0.0000  
     -15.7683 2.1488 1.0338 1.0000 2.8793 0.0000 0.0000 0.0000  
 Cu 1.9771 2.0000 63.5460 1.6202 0.2741 1.0000 0.1000 1.0000  
     13.7875 4.7439 1.0000 0.0000 0.0000 2.9838 6.0000 0.0000  
     -1.0000 0.0000 80.7000 34.9555 0.4988 0.0000 0.8563 0.0000  
     -0.1243 3.1491 1.0000 4.0000 2.5791 0.0000 0.0000 0.0000  
 3 ! Nr of bonds; Edis1;LPpen;n.u.;pbe1;pbo5;l3corr;pbo6  
     pbe2;pbo3;pbo4;Etrip;pbo1;pbo2;ovcorr  
 1 1 113.9232 0.0000 0.0000 -0.5971 0.0000 1.0000 6.0000 0.9093  
     1.7152 1.0000 0.0000 1.0000 -0.0450 6.0710 0.0000 0.0000  
 2 2 26.4159 0.0000 0.0000 0.7357 -0.2000 0.0000 16.0000 0.3169  
     0.2678 -0.2000 15.0000 1.0000 -0.1593 4.1024 0.0000 0.0000  
 1 2 47.0693 0.0000 0.0000 0.9599 0.0000 1.0000 6.0000 0.3591  
     0.0204 1.0000 0.0000 1.0000 -0.0710 7.9806 0.0000 0.0000  
 1 ! Nr of off-diagonal terms; Ediss;Ro;gamma;rsigma;rpi;rpi2

1 2 0.9999 0.8942 14.9978 1.9994 -1.0000 -1.0000  
5 ! Nr of angles;at1;at2;at3;Thetao,o;ka;kb;pv1;pv2  
1 1 1 0.0000 27.9213 5.8635 0.0000 0.0000 0.0000 1.0400  
1 2 1 89.0363 5.0589 4.8604 0.0000 0.8141 0.0000 1.4290  
1 1 2 59.7817 20.1663 1.5872 0.0000 2.8343 0.0000 1.3764  
2 1 2 4.9491 5.7486 7.2109 0.0000 0.3755 0.0000 1.5182  
1 2 2 43.6373 1.2986 6.1920 0.0000 1.4977 0.0000 4.6641  
0 ! Nr of torsions;at1;at2;at3;at4;;V1;V2;V3;V2(BO);vconj;n.u;n  
0 ! Nr of hydrogen bonds;at1;at2;at3;Rhb;Dehb;vhb1

## References

- 1 N. Jakse and A. Pasturel, *Phys. Rev. Lett.*, 2003, **91**, 195501.
- 2 W. F. Gale and T. C. Totemeier, *Smithells Metals Reference Book 8th Edn*, (Butterworth-Heinemann, Oxford, 2004).
- 3 K. Kambe, *Phys. Rev.*, 1955, **99**, 419.
- 4 Y. G. Li and P. A. Korzhavyi, *Dalton. T.*, 2017, **46**, 529.
- 5 R. Burtovyy and M. Tkacz, *Solid. State. Commun.*, 2004, **131**, 169.
- 6 P. A. Korzhavyi, I. L. Soroka, E. I. Isaev, C. Lilja, and B. Johansson, *Proc. Natl. Acad. Sci.*, 2012, **109**, 686.
